# Supplementary material
Source: PubMed Central journal article supplement (PMC8095453)
Supplement: JB.00661-20-s0001.pdf [file JB.00661-20-s0001.pdf]

## Supplemental Figures

**a**

WT pBR322-ColV

 $\Delta cvpA$  pBR322-ColV $\Delta cvpA$  pBR322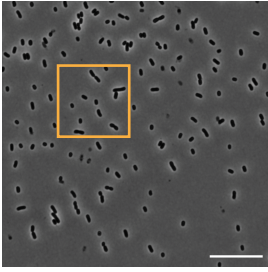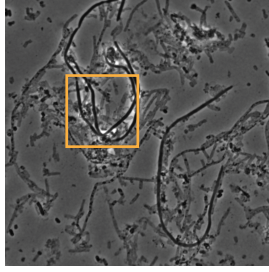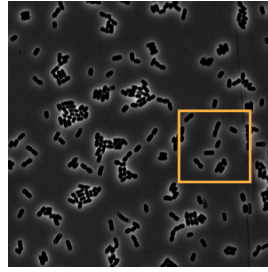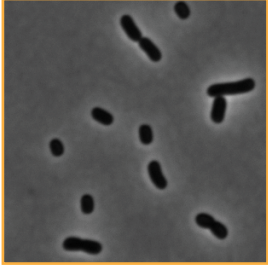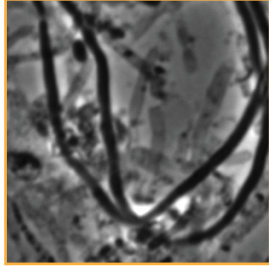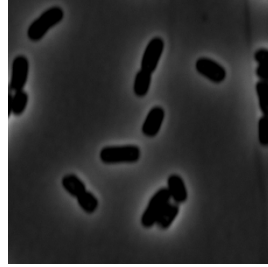**b**

WT

 $\Delta cvpA$ 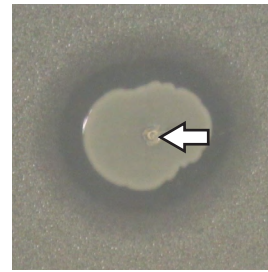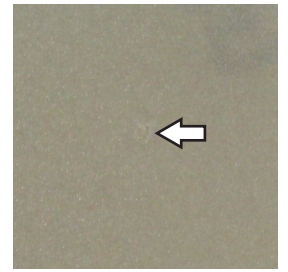

**Figure S1:  $\Delta cvpA$  EHEC is sensitive to Colicin V production and does not appear to secrete it.** a) Micrograph of overnight culture of indicated strains expressing ColV from plasmid pBR322-ColV or carrying empty vector plasmid pBR322. Scale bar is 10  $\mu$ M. Orange box denotes inset. b) 5  $\mu$ L jab of overnight culture of indicated strain in soft agar matrix containing 100  $\mu$ L of indicator (sensitive EHEC) strain. Arrow indicates position of jab. Line represents 20 mm.

|                                      | P              | TM                       | C                    | TM                | P         | TM    |                 |                |
|--------------------------------------|----------------|--------------------------|----------------------|-------------------|-----------|-------|-----------------|----------------|
|                                      | 1              | 11                       | 21                   | 31                | 41        | 51    | 61              | 71             |
| <i>Escherichia coli</i>              | ---MVW---      | DYAIIAVIAFSSLSVSLIRGFVRE | EVLSSLVTWGC          | CAFFVASHYYTYLSVWF | ---       | TGFE  | DELVNRNGIAIAVLF | IATLIVGA       |
| <i>Enterobacter cloacae</i>          | ---MVW---      | DYAIIAVIAFSSLSVSLIRGFVRE | EALSLVTWGC           | CAFFVASHYYTYLSVWF | ---       | TGFE  | DELVNRNGIAIAVLF | IATLIVGA       |
| <i>Serratia marcescens</i>           | ---MVW---      | DYVIAVIAFSSLSVSLIRGFVRE  | EALSLVTWGC           | CAFFVASHFYSLAVYF  | ---       | TRFE  | DELVNRNGIAIAILF | IATLIVGA       |
| <i>Bradyrhizobium algieriense</i>    | ---MPITI---    | DLVLLGVMLISGLLAMVRGFMR   | EILSIAAWGAAALVTLYAF  | SKLLPTA           | ---       | KTYFN | NDTVASVVVA      | GTFI           |
| <i>Agrobacterium tumefaciens</i>     | ---MPITI---    | DGIVIAVVLFSAILAMVRGF     | REILSIAAWGAAALVTLYAF | SKLLPTA           | ---       | RNYT  | DDDKIAIAGS      | AVVFLVSLIVIS   |
| <i>Neisseria meningitidis</i>        | ---MNNLPV---   | ADLLVSAIIAACIVLSAMR      | GVIAEAGSMAAWVVAFFA   | AKLFAAPFADIA      | ---       | FASFQ | PRLFALALS       | SFISLFVIACLIQK |
| <i>Thermodesulfobium acidiphilum</i> | ---MNL---      | DLILLIVIIISYFSGYKTL      | GLIVVFTFLFAFFLSLYL   | PLHMLNIAEAF       | ---       | SKALL | FNGKCLIS        | ISFIFTLMLNALV  |
| <i>Leptotrichia shahii</i>           | ---MI---       | LDIGFVLLIIFIFLGYKRG      | FSLEFFNMFKYIFIFIT    | NYVYKFFLDSK       | ---       | RIKPK | SQLKIF          | IIIVVIQYIIYS   |
| <i>Granulicella tundricola</i>       | MQLPPTTSYNP    | FDWFLVVLIVISTIAAFMR      | GLIRSLLSLVGFILAI     | IVVASWNYLSFAS     | ---       | GRWIL | NFTVAEII        | IAYLTLIVITIAFS |
| <i>Thermovibrio ammonificans</i>     | ---MGLPTMNV--- | LDGLIIIIILGNLIRGFN       | KGLVELELLSLSGMV      | SVLSYAYKLT        | PFVAKKL   | ---   | VGYA            | ---DPTTL       |
| <i>Bacteroides fragilis</i>          | ---MTT---      | DIILIALGAGVIVGF          | MKGFIHQASILGLIV      | GLLAAKALY         | TS LAVKL  | ---   | CPTVT           | DSMTVAQILAF    |
| <i>Fibrobacter succinogenes</i>      | ---MNW---      | DIACAACLLVFGIIGLWR       | GLSSVFRLC            | AWVAAILGAY        | FAQGLL    | ---   | IHNFA           | FSDFTAHLICT    |
| <i>Mycococcus xanthus</i>            | ---MV---       | DLIILGLVLFMGAIT          | GASRQVANVGLAV        | GYFASRRL          | GPVAA     | ---   | AEALG           | SPLFLG         |
| <i>Tetragenococcus muritaticus</i>   | ---MI---       | LTWIILLVLI               | GGFFIGLRR            | GLVQVVG           | LTFGFI    | IA    | AAASLY          | SNTLAPYLSW     |
| <i>Spirochaeta cellobiosiphila</i>   | ---MNLVLL---   | MDIIFLMI                 | GGVFFVGGFR           | GFVTEI            | INFMTLV   | GGV   | ILAV            | ALG            |
| <i>Flavobacterium segetis</i>        | ---MGF---      | DIILCALLVAFYKGVN         | GLFIELASLISL         | LIYFAIK           | FSSFMKEIL | ---   | NGFV            | KWNPNTVQV      |
| <i>Flexistipes sinusarabici</i>      | ---MPI---      | TDIVILIIIGFFAVK          | GLFGLINEV            | FGLGLI            | GYILS     | ---   | YLG             | ISEE           |
| <i>Pyramidobacter piscolenis</i>     | ---MTLVDGF---  | LDMLLVIVVFAV             | KIFRFGSE             | EIFSLAGV          | GGVYFK    | ---   | RNFF            | GS             |
| <i>Sulfuricurvum kujijense</i>       | ---MDLNY---    | FDLVGSVILL               | LKGLNLGSK            | EVFGLV            | GGVFA     | ---   | SDVLF           | HFESSAA        |
| <i>Campylobacter jejuni</i>          | ---MNFYW---    | FDAFILG                  | FLLGLKGI             | INGLIKE           | IFG       | ---   | QSTFY           | KIENQSLA       |

|  | C              | TM    | P         |          |        |
|--|----------------|-------|-----------|----------|--------|
|  | 81             | 91    | 101       | 111      | 121    |
|  | I-VNFVIGQLVEK  | TGLS  | ---GDRVLG | VCFGALRG | VLIVAA |
|  | I-VNYVIGQLVEK  | TGLS  | ---GDRVLG | VCFGALRG | VLIVAA |
|  | I-VNYVIVSSLVEK | TGLS  | ---GDRVLG | VCFGALRG | VLIVAA |
|  | V-ITVRISDMILDS | RITG  | ---ALDRTL | GFLFLG   | LRG    |
|  | F-ITSRIADDFID  | SRI   | ---ALDRTL | GFLFLG   | LRG    |
|  | I-LRSLLTGAVS   | AVGLG | ---FANRIL | GGVFG    | ALKG   |
|  | K-FLLLVADILG   | ISRTS | ---KNSFI  | AGFL     | NVLLS  |
|  | A-ILIIINREF    | LKS   | IKIK      | ---RFDK  | SSG    |
|  | M-LANLLRKT     | ASAV  | GLG       | ---FLDR  | LLG    |
|  | Y-FASLIDR      | KVR   | KTALN     | ---FINN  | VLF    |
|  | L-VASVLT       | KALE  | AVSLG     | ---WLN   | RML    |
|  | L-I            | GHIV  | GDSIK     | N        | TIVG   |
|  | YALG           | ALLR  | ILST      | G        | QHNE   |
|  | I-LGSS         | LD    | FLAS      | L        | PLLN   |
|  | L-AQN          | MLN   | MVEN      | L        | NLE    |
|  | L-LG           | KFLT  | GIAN      | FA       | FLG    |
|  | L-SG           | KLAR  | FFKA      | I        | QLG    |
|  | L-I            | GKLF  | RALL      | S        | MSLS   |
|  | A-LG           | SGFK  | KL        | TS       | SLG    |
|  | L-V            | GNF   | LS        | KL       | IKLS   |

|  | 131  | 141 | 151 | 161  |
|--|------|-----|-----|------|
|  | SKSE | DWS | KS  | QLIP |
|  | SKSE | DWS | KS  | QLIP |
|  | SQ   | SAD | WK  | QS   |
|  | QR   | P   | D   | W    |
|  | TQ   | PE  | W   | T    |
|  | P    | T   | E   | W    |
|  | L    | F   | S   | N    |
|  | I    | R   | D   | K    |
|  | S    | E   | W   | V    |
|  | L    | I   | K   | R    |
|  | I    | S   | Q   | T    |
|  | N    | L   | R   | N    |
|  | D    | P   | K   | R    |
|  | T    | A   | Q   | E    |
|  | D    | P   | Q   | K    |
|  | A    | K   | K   | E    |
|  | A    | F   | S   | K    |
|  | L    | P   | G   | V    |
|  | N    | F   | E   | G    |
|  | K    | L   | D   | N    |

**Figure S2: MUSCLE alignment of 20 CvpA homologs from bacterial species**

**across diverse phyla.** Residues with >70% conservation across species are indicated by a colored box. Residue numbering and predicted membrane topology for the *E. coli* CvpA is shown above the alignment. The green box indicates predicted periplasmic (P) segments, the gray box indicates transmembrane (TM) segments, and the pink box represents cytoplasmic (C) segments.
